# Supplementary material for: Histogram-Based Calibration Method for Pipeline ADCs
Source: PLoS One. 2015 Jun 12;10(6):e0129736. doi: 10.1371/journal.pone.0129736 (PMC4466524; doi:10.1371/journal.pone.0129736)
Supplement: S1 File — Test results indluding DNL and INL in each step are described. (XLSX) [file pone.0129736.s001.xlsx]

## Sheet: DNL
Before calibration	After calibration
5.44	-0.03
-0.07	0			MAX	MIN
0.04	0.12		Before calibration	5.44	-0.99
-0.07	-0.13		After calibration	0.28	-0.26
0.06	-0.01
-0.11	0.04
0.1	0.01
-0.05	0.03
0.04	-0.02
-0.05	-0.04
0.09	0.05
-0.03	-0.03
-0.03	-0.04
0.02	0.03
-0.07	-0.05
0.09	0.02
0.06	0.01
-0.11	0.09
-0.03	-0.02
0.05	-0.09
0.11	0.05
-0.09	-0.06
-0.07	0.07
0.04	-0.03
0	0.01
0	-0.01
0.05	-0.02
-0.04	0.09
0.03	-0.03
-0.1	-0.01
0.03	-0.06
0.03	0.15
0.03	-0.12
0.03	-0.02
-0.1	0.06
0.05	-0.04
-0.03	0.03
0.07	-0.05
-0.07	0.04
0.02	0.05
0.11	-0.05
-0.03	0
0.03	-0.04
-0.05	0.08
-0.12	-0.09
0.19	0
-0.1	-0.01
0.05	0.04
-0.08	0.03
-0.01	-0.02
0.08	0.06
-0.08	-0.1
0.02	0.06
-0.04	-0.01
0.1	-0.02
0.02	0.03
-0.14	0.07
0.11	-0.07
-0.08	-0.03
0.02	0.06
0.03	-0.06
-0.03	0
0	0.03
-0.03	-0.07
0.11	-0.02
-0.03	0.03
-0.06	0.05
0	0.03
0.04	0.09
-0.03	-0.02
-0.02	-0.09
0	0.16
0.04	-0.23
-0.07	0.19
0.07	-0.14
-0.06	-0.02
0.07	0.07
0.04	0
0.01	0.03
-0.11	-0.01
0.09	-0.01
-0.09	-0.12
0.02	0.05
-0.03	0.07
0.13	0.03
-0.1	-0.13
0	0.18
-0.02	-0.08
0.1	-0.04
-0.05	-0.01
-0.02	-0.01
0.07	0.07
-0.05	-0.1
-0.05	0.12
0.02	-0.03
0.07	-0.03
-0.04	0.03
0.15	-0.09
-0.09	0.06
0.01	0.06
-0.11	-0.12
0.06	0.04
0	-0.03
-0.01	0.01
0.01	0.01
-0.08	0.01
0.12	0.08
-0.06	-0.12
0.01	0.07
0	-0.08
0.03	0.03
-0.01	-0.04
0.06	0.1
-0.1	-0.02
0.02	-0.04
0.04	0.04
-0.05	-0.05
0.11	0
-0.11	0.1
0.02	-0.13
0.01	0.08
-0.02	0.01
-0.01	0.03
-0.06	-0.01
0	-0.11
0.01	0.02
0.03	0.06
-0.02	-0.08
0.07	0.05
0.02	0.12
0	-0.16
-0.07	0.1
0.15	-0.07
-0.14	0.03
0	0.07
0.07	-0.06
-0.08	0.09
0.08	-0.09
-0.06	-0.02
0.02	-0.01
0.02	-0.06
-0.06	0
0.08	0.12
-0.05	-0.1
0.04	0.13
0	-0.11
-0.08	0.08
0.11	-0.1
-0.14	0
0.02	0.1
0.14	-0.04
-0.08	-0.02
-0.03	-0.02
0.06	0.09
0	-0.11
-0.07	0.05
0.03	0.08
-0.01	-0.11
-0.04	0.01
0.01	0.11
0.12	-0.11
-0.15	0.03
0.12	-0.03
0.03	0
-0.08	-0.01
-0.04	0.18
0	-0.19
0.09	0.03
-0.03	-0.02
-0.03	0.06
0.08	-0.09
-0.06	0.09
0.04	-0.04
0.03	0.08
-0.11	-0.12
0.12	0.07
-0.07	-0.07
0.04	0.05
0.08	0.05
-0.07	-0.06
-0.13	0.05
0	-0.02
0.13	0.07
-0.1	-0.07
0.01	-0.05
0	0.05
0	0.03
0.12	0.02
-0.1	-0.09
0.02	0.04
0	-0.09
0.01	0.15
-0.05	0.05
0.03	-0.09
-0.01	-0.01
0.01	-0.08
0.02	-0.01
-0.06	0.07
0.07	0.16
-0.01	-0.2
-0.01	0.07
-0.08	0.07
0.12	-0.11
-0.06	-0.01
-0.02	0.14
-0.01	-0.18
0.08	0.12
-0.03	-0.06
0.04	0.05
-0.07	-0.13
0.04	0.05
-0.04	0
0.02	0
0.01	0.06
-0.05	-0.02
0.01	-0.02
0	-0.01
0.07	0.02
-0.03	-0.01
-0.03	-0.03
-0.01	0.04
0.02	0
-0.01	0.02
0.02	-0.01
0.08	0.03
-0.04	-0.09
-0.01	0.02
0.09	0.01
-0.06	-0.01
0.01	0.04
-0.02	0.03
0.02	0.06
-0.08	-0.14
-0.02	0.01
0.06	0.01
-0.09	0.12
0.05	-0.15
0.02	-0.02
0.02	0.12
-0.04	-0.1
0.04	0.02
0.05	0.04
-0.03	0.02
0.03	-0.02
0.02	-0.09
-0.05	0.06
-0.11	0.06
0.08	0.05
0.02	-0.08
-0.09	-0.03
0.03	0.06
0.03	-0.03
-0.03	0.08
0.04	-0.15
0.02	0.13
0.05	-0.06
-0.09	-0.05
0.01	0.05
0.03	0.1
0.02	-0.08
-0.02	-0.07
0.02	0.07
-0.09	-0.05
0.05	0.03
-0.02	-0.02
-0.05	0.05
0.16	0
-0.04	0.03
-0.03	-0.09
-0.04	0.04
-0.05	-0.02
0.14	-0.02
-0.05	0.02
-0.06	0.03
0.13	-0.04
-0.05	-0.03
-0.01	0.1
0.02	-0.03
0	0
-0.04	-0.05
-0.06	0
0.07	0.01
0.03	-0.05
-0.03	0.02
-0.06	-0.01
0.01	0.08
-0.05	-0.01
0.07	-0.06
0.22	0.07
-0.23	-0.06
0.05	0
-0.08	0.04
0	-0.04
0.08	0.07
0.02	-0.02
-0.1	-0.11
0.14	0.08
-0.09	0.07
0.1	-0.11
-0.02	0.09
-0.08	-0.06
0.04	0.04
0.03	-0.02
-0.11	0.09
0.04	-0.1
-0.01	-0.02
0.05	0.1
0.02	-0.08
-0.09	0
0.01	-0.06
0.02	0.03
-0.06	0.1
0.05	-0.09
0.13	0.03
-0.14	0.07
0.05	-0.06
-0.01	-0.04
0.04	-0.02
-0.02	0.02
0.07	0.01
-0.1	0.02
0.01	-0.06
-0.03	0.08
0.1	-0.05
-0.03	0.07
-0.02	0.02
-0.02	-0.04
0.02	0
-0.08	-0.02
0.04	-0.05
-0.02	0.07
0.05	-0.08
0.01	-0.01
-0.05	0.11
-0.02	-0.05
0.05	0
0.05	0.14
-0.07	-0.09
0.15	-0.01
-0.14	-0.02
0.05	-0.01
-0.07	-0.01
-0.05	0.03
0.09	-0.05
-0.07	-0.03
0.01	0.05
0.07	0
-0.03	0.06
0.06	0.01
-0.01	-0.01
-0.04	-0.1
-0.05	0.1
0.07	-0.03
-0.06	-0.07
0.12	0.02
-0.08	0.02
0	-0.01
0.07	0
-0.03	0.03
-0.06	0.01
-0.03	-0.03
0.05	0.01
-0.02	-0.04
-0.02	0.02
0.1	0.09
-0.14	-0.09
0.05	-0.06
-0.03	0.13
0.08	-0.02
-0.01	-0.11
0.03	0
0.01	0.1
-0.07	-0.04
0	0.05
-0.04	-0.06
0.05	-0.02
0.02	-0.01
0	0.13
0	0.02
-0.02	-0.16
0.16	0.04
-0.14	0
-0.02	-0.04
0.04	-0.01
0.02	0.15
-0.06	-0.1
0.14	0.03
-0.07	0.01
0.25	0.05
-0.1	-0.05
-0.04	-0.03
0	0
0.07	0.14
-0.06	-0.2
0.04	0.13
-0.06	-0.05
0.1	0.12
-0.01	-0.18
-0.1	0.07
0.03	0.01
-0.04	-0.04
0.07	0.02
0.15	-0.04
-0.14	0.01
0.05	-0.01
-0.05	0
-0.09	0.07
0.01	-0.06
0.08	-0.01
-0.08	0.03
-0.01	-0.04
0.01	0.01
-0.02	0.03
0.05	-0.04
0.14	0.09
-0.12	-0.1
0.08	0.04
-0.11	-0.05
0.01	0.04
0.05	0.06
-0.02	-0.03
0.02	0
0	-0.02
-0.05	0
-0.02	-0.02
0.07	0.03
-0.06	0
0.09	-0.02
-0.06	-0.01
-0.04	0.07
0.04	0.06
0.01	-0.12
-0.02	-0.01
0	0.02
0.05	0.03
-0.08	0.04
0.05	-0.07
-0.04	0.01
0.05	0.06
-0.01	-0.06
0.04	-0.01
-0.04	-0.05
0.1	0.07
-0.16	0.06
0.08	0.04
-0.09	-0.02
0.05	-0.09
0.03	-0.02
-0.07	0
0.09	0.05
-0.1	-0.1
0.1	0.08
-0.01	-0.06
-0.03	0.05
0.06	0
-0.11	0.03
0.1	-0.09
-0.08	0.22
-0.02	-0.14
0.06	-0.05
0.03	-0.03
-0.03	0.15
-0.02	-0.1
0.04	-0.02
-0.02	0.09
-0.03	-0.05
0.08	-0.03
-0.01	0
-0.07	0.04
0.09	0.04
-0.07	-0.03
0.03	-0.09
0.07	0.07
-0.03	-0.03
-0.08	0.06
0.11	0
-0.07	-0.09
-0.06	0.08
0.07	0.04
-0.07	-0.02
0.03	0.02
0.05	-0.12
-0.08	0.01
0.01	0.01
-0.04	0.1
0.1	-0.01
-0.06	-0.08
0	0.04
0.06	-0.05
-0.08	0.04
0.07	0.09
-0.03	-0.04
0.01	-0.11
-0.02	0.07
-0.02	-0.08
0.01	0.1
0.07	-0.08
0	0.08
0.01	-0.01
-0.05	0.01
0.01	-0.09
-0.04	0.13
0.07	-0.05
-0.02	0.03
-0.03	-0.03
0.06	0.04
-0.06	-0.05
0.02	-0.01
-0.06	-0.02
0.03	0.1
-0.03	-0.1
0.02	0.18
0.05	-0.09
0.06	-0.11
-0.08	0.06
-0.02	-0.01
0	-0.03
-0.01	-0.02
-0.01	0.07
0.07	-0.06
0.03	-0.01
0.02	-0.02
-0.06	0.18
0.03	-0.14
-0.01	0.07
0	-0.06
-0.02	-0.06
0.05	0.01
-0.02	0.04
-0.08	0.04
0.03	0
0.07	0.15
-0.12	-0.14
0.06	-0.05
0.01	0.07
0.09	-0.06
-0.15	-0.02
0.06	0.04
-0.02	0.07
0.02	-0.1
0.02	0.05
0.01	0.03
-0.06	-0.04
0.03	-0.08
0.09	0.05
0	-0.01
-0.15	0.05
0.15	-0.05
-0.11	0
-0.05	0.04
0.04	0.09
0.04	-0.1
0	-0.03
0	-0.01
0.06	0.04
0.01	-0.04
-0.06	0.04
-0.02	0.03
-0.03	-0.07
0.02	0.01
0.11	-0.04
-0.09	0.07
-0.04	0.06
0	-0.11
0.1	0.08
-0.13	-0.1
0.07	0.04
0.1	0.07
-0.16	-0.09
0.02	0.02
0.04	0.09
-0.08	-0.09
0	-0.01
0.02	0.04
0.04	0.03
0.08	-0.07
-0.06	-0.03
-0.04	0.05
0.08	0.04
-0.07	0
0.08	-0.03
-0.03	-0.04
-0.05	0.01
0.01	0.09
-0.05	-0.02
0.02	-0.02
0.07	-0.05
0.05	0.06
-0.08	-0.03
0.03	-0.06
0	0.05
-0.08	-0.03
0.02	0.06
0.11	0.06
-0.04	-0.08
0.05	-0.01
-0.13	0.01
0.05	-0.04
-0.02	0.02
-0.02	0.09
0.05	-0.13
0.03	0.06
0.01	-0.05
0.06	0.01
-0.16	0.03
0.07	-0.01
0.04	0.04
-0.03	-0.1
0.02	0.18
0.01	-0.13
0.04	0.06
-0.04	-0.1
-0.02	0.01
0	0.07
-0.05	0
0.01	-0.01
0.09	0
-0.06	0.1
0	-0.07
0.05	-0.09
-0.08	0
0	0.08
-0.01	0
0.03	-0.04
-0.04	0
0.07	0.02
-0.08	0.03
0.05	-0.02
0.02	-0.05
-0.06	0.04
0.01	0.09
0.1	-0.14
-0.08	0.03
-0.03	-0.02
0.13	0.02
-0.16	0.05
0.01	-0.1
0.06	0.08
0.01	-0.02
-0.07	0.06
0.07	-0.11
-0.01	0.04
0.06	-0.01
-0.06	0.01
0.1	-0.04
0.08	-0.01
0.04	0.06
-0.09	-0.02
0.01	0.05
0.03	-0.03
0.08	0.03
0	-0.05
-0.04	0.08
-0.1	0
0.02	-0.07
0.05	-0.02
-0.02	0.11
-0.03	-0.13
0.06	0.04
0	-0.02
-0.02	0.05
-0.04	0.03
0.03	0.01
0	-0.07
0.02	0.12
0.04	-0.05
-0.05	-0.07
0.06	0.07
-0.13	-0.11
0.17	0.01
-0.15	0.04
-0.01	0.08
0.05	-0.05
0.13	0.04
-0.17	0
0.07	-0.01
-0.04	-0.09
0.02	-0.01
-0.01	0
0.22	0.05
-0.13	0.01
-0.06	-0.05
0.04	0.08
0.01	-0.03
-0.07	-0.02
-0.06	0.09
0.06	-0.06
-0.04	-0.01
0.07	0.05
-0.04	-0.04
0.07	0.03
-0.07	-0.08
-0.02	0.12
0.12	-0.17
-0.09	0.09
0.02	0.11
-0.02	-0.15
-0.01	0.02
0.04	0.06
0.02	-0.06
-0.1	0.03
0.11	0.11
0.06	-0.17
-0.19	0.13
0.02	-0.16
0.07	0.12
0.07	-0.09
-0.06	0.04
-0.1	0.02
0.03	-0.03
-0.01	-0.07
0.02	0.05
0.01	-0.02
0.1	0.05
-0.1	-0.08
0.13	0.09
-0.14	0.01
0.02	-0.07
0.04	0.13
-0.09	-0.14
0.09	0.12
-0.07	-0.05
0.09	0
-0.05	-0.08
-0.04	0.07
0.14	-0.05
-0.1	0.04
0.08	-0.01
0.01	-0.01
-0.09	0.01
-0.05	0.07
0.05	-0.01
-0.01	0.05
-0.01	-0.08
0.06	0.07
-0.03	-0.11
-0.05	0.01
0.12	-0.01
-0.14	0.03
0.01	0.04
0.01	-0.01
0.11	-0.04
-0.09	0.04
0.07	-0.08
0.01	0
-0.11	0.09
0.04	0
0.06	-0.09
-0.04	0.02
-0.03	0.09
0.02	-0.06
0.02	-0.04
-0.04	0.05
-0.04	-0.02
0.12	0.08
-0.01	-0.1
-0.11	-0.02
0.11	0.02
0.03	0.08
-0.1	-0.02
0.09	0.08
0.05	-0.07
-0.1	-0.05
0.03	0.07
0.17	0.01
-0.2	-0.03
0.08	-0.09
-0.07	0.03
-0.02	0.06
0.11	-0.1
0.01	0.15
-0.13	-0.09
0.07	-0.04
-0.04	0.02
-0.03	0.02
0.06	0.01
0	0.06
-0.06	0.02
0.1	-0.16
0.03	0.19
0.01	-0.1
-0.07	-0.03
-0.03	-0.04
0.02	0.02
0.02	-0.01
-0.08	0.03
0.08	0.01
0	0.01
-0.09	0.13
0.07	-0.14
-0.06	0.02
0	0.05
0.2	-0.12
-0.16	0.07
0.14	0.01
-0.14	-0.08
0.01	0.04
-0.06	-0.01
0.07	0.11
-0.04	-0.16
0.05	0.11
0.05	0.05
-0.01	0
-0.08	-0.11
0.07	0.06
-0.06	-0.03
0.02	-0.03
-0.02	0
0.07	-0.01
-0.01	0.05
-0.02	-0.06
0.05	-0.04
0.01	0.11
0	-0.01
0	-0.01
-0.14	-0.05
0.09	0.03
0.04	0
-0.09	0.06
0.04	0.01
-0.01	-0.05
-0.04	-0.07
-0.01	0.01
0.04	0.1
-0.03	-0.04
-0.01	-0.05
0.05	0.04
-0.04	-0.05
0.11	0.04
-0.03	0.07
-0.08	-0.1
0.03	-0.01
-0.01	-0.02
-0.06	0.12
0.18	-0.05
-0.14	-0.03
0.01	0.05
-0.03	-0.01
0.05	0.03
-0.01	-0.11
-0.04	0.1
0.09	-0.08
-0.07	0.09
0.06	-0.02
0	0.06
-0.08	-0.05
0.16	-0.04
-0.06	0
-0.02	-0.05
0.11	0.01
-0.15	0.04
0.16	-0.02
-0.14	0.06
0.02	-0.06
0.1	0.06
-0.2	0.03
0.18	-0.08
-0.11	0.16
0.13	-0.19
0.02	0.08
-0.11	0.02
0	-0.06
-0.02	0.04
-0.01	-0.07
0.11	0.09
-0.08	0.02
-0.07	-0.11
0.02	0.07
0.1	-0.02
0.05	-0.02
-0.12	0.05
-0.05	-0.08
0.06	0.08
0.11	-0.06
-0.16	0.03
0.04	0.05
0.01	-0.06
-0.02	-0.04
0.02	0.03
-0.04	0.08
0.03	-0.1
-0.03	0.05
0.05	0.02
-0.07	-0.11
0.02	0.17
-0.04	-0.06
0.09	-0.05
-0.05	0
0.04	0.02
-0.02	-0.08
-0.04	0.09
0.09	0.04
-0.02	-0.08
0.06	0.04
-0.05	-0.07
-0.09	0.1
0.04	-0.05
0.15	0
-0.12	-0.04
0	0.06
0.25	-0.03
-0.06	-0.01
0	0.02
-0.03	0.07
0.02	-0.11
-0.06	0.07
0	-0.07
0.1	0.1
-0.03	-0.1
-0.06	-0.04
0.02	0.09
0.01	0.04
0.03	-0.02
0.01	-0.01
-0.07	0.08
-0.03	-0.16
0.01	0.07
0.06	-0.01
-0.03	-0.02
0.03	0.05
0.04	-0.08
-0.05	-0.02
0.06	0.13
-0.03	-0.1
-0.04	0.01
0.05	0.01
0	-0.04
-0.04	0.06
-0.05	0.06
0	-0.06
-0.02	0
0.04	-0.08
0.08	0.07
0	-0.01
-0.09	-0.01
0.02	-0.05
0.01	0.12
0.07	-0.08
0	0.07
0.02	-0.09
-0.05	0.09
-0.08	-0.04
0.14	-0.06
-0.11	0.04
-0.03	0.09
0.06	-0.04
0.02	-0.09
-0.02	0.05
0	0.01
0.08	0.08
-0.07	-0.01
0	-0.04
0.05	-0.08
-0.05	0.08
0	-0.08
-0.05	0.09
0.02	-0.05
0	0.05
0.05	-0.06
-0.03	0.06
0.02	-0.03
0.09	-0.02
-0.14	0.01
0.1	-0.06
-0.07	0.11
0.04	-0.07
-0.01	0
-0.05	0.04
0.05	-0.05
0	0
0.02	0.07
-0.03	-0.08
-0.06	0.2
0.09	-0.19
-0.08	-0.03
0.06	0.03
0.1	0.05
-0.12	-0.06
0.01	0.08
0.02	0.01
0	-0.05
0.01	0.01
-0.06	0.07
0.09	-0.06
-0.08	0.06
0.08	-0.12
-0.14	0.03
0.07	0.03
0.08	0.05
0.02	0.01
-0.09	0.05
-0.01	-0.06
0.02	-0.12
0.01	0.03
-0.01	0.09
-0.02	-0.09
-0.04	0.07
0.18	-0.03
-0.07	0.01
-0.07	-0.05
0.04	0.13
-0.05	-0.1
-0.03	-0.01
-0.01	0.02
0.06	-0.06
-0.03	0.05
0.01	-0.04
0	0.04
0.11	-0.02
-0.16	0
0.04	-0.04
0	0.14
-0.02	-0.06
0	-0.06
-0.02	0.06
0.16	-0.01
-0.04	-0.01
-0.09	0.02
0.07	-0.04
-0.09	-0.01
0.03	0
0.07	0.02
0.03	0.08
-0.08	-0.07
-0.04	-0.05
0.15	0.08
-0.04	-0.03
-0.01	0.01
-0.13	0.08
0.13	-0.13
0	0.03
0	0.08
-0.09	-0.12
0.12	0.12
-0.04	-0.1
-0.08	0.06
0.02	0.01
-0.01	-0.06
0.04	0.01
-0.08	-0.02
0.12	-0.01
-0.08	0.04
0.17	0.07
-0.16	-0.08
0.02	-0.04
0	0.04
0.03	0.1
0.05	0.02
-0.1	-0.08
0.02	-0.1
0.01	0
0	0.03
0	0.17
0.08	-0.05
0	-0.08
-0.14	-0.07
0.04	0.07
0.02	0.04
0.08	0.11
-0.08	-0.16
0	-0.01
0	-0.02
0.02	0.11
-0.06	-0.01
-0.01	-0.03
0.07	0.04
-0.02	-0.1
-0.01	0.03
-0.02	-0.01
0.08	-0.01
-0.02	0
-0.03	-0.04
0.02	0.01
0.05	0.07
0	0.03
0.01	-0.11
-0.05	0.05
-0.06	-0.03
0.09	0.04
-0.12	-0.02
0.13	0.03
-0.05	-0.05
-0.03	0.16
0.01	0
0.03	-0.1
0	0.05
-0.01	-0.06
-0.04	-0.03
-0.04	0.02
0.08	-0.06
-0.01	0.14
0.02	-0.08
-0.04	0.01
0.08	-0.04
-0.06	0.06
-0.01	-0.05
0.04	-0.06
-0.07	0.05
0.06	0.01
0.02	0.07
-0.01	0.04
0.02	-0.15
0.08	0.06
-0.1	0
-0.05	-0.04
-0.01	0.09
0.05	0
-0.06	-0.09
0.04	0.02
0.11	0.06
-0.14	-0.06
0.04	0.08
-0.05	-0.03
-0.03	-0.09
0.07	0.04
-0.06	0.04
0.16	0.06
-0.17	-0.07
0.1	0.01
-0.04	-0.09
0.05	0.02
0.06	0
-0.06	0.09
-0.02	0.02
-0.02	-0.05
-0.01	0.03
-0.03	-0.05
0.03	0.03
0	0.11
-0.05	-0.15
0.15	0.03
-0.04	-0.01
0.05	0.02
-0.14	0.07
-0.02	-0.16
0.13	0.08
-0.04	-0.02
-0.08	0.05
0.06	-0.03
-0.01	-0.04
0.02	-0.01
-0.01	0.05
0.2	0
-0.22	0.01
0.06	-0.01
0.04	-0.08
-0.01	0.13
-0.06	-0.12
0.04	0.07
-0.1	0.14
0.11	-0.19
-0.14	0.08
0.06	-0.06
-0.01	-0.06
0.07	0.24
0	-0.13
0.19	0.13
0.05	-0.12
-0.02	-0.01
-0.09	0.05
-0.07	-0.11
0.06	0.05
-0.05	0
0.05	-0.1
0	0.09
0.09	-0.04
0	0
-0.03	0.09
-0.11	-0.08
0.04	0.1
0.05	-0.14
-0.02	0.14
0.01	-0.08
-0.02	0.05
0.09	0.03
-0.14	-0.03
0.03	-0.09
0.13	0.13
-0.1	-0.11
-0.01	0.12
0.04	-0.07
0.02	-0.08
-0.05	-0.02
-0.03	0.07
0.08	-0.04
-0.09	0.02
0.1	0.02
0.01	-0.06
-0.01	0.04
-0.08	-0.03
0.02	0.06
-0.02	-0.06
-0.02	0.02
0.04	0.05
0.03	0.05
0	-0.12
-0.1	0.07
0.04	-0.02
0.1	0.05
-0.08	-0.01
-0.03	-0.05
0.11	-0.03
-0.07	0.02
0.03	0.03
-0.02	-0.06
-0.08	0.11
0.08	-0.01
-0.01	-0.12
0.05	0.12
-0.07	-0.07
0.04	-0.04
0.01	0.04
-0.02	0.08
0.07	-0.09
-0.05	0.08
-0.09	0
0.13	-0.05
-0.03	0.06
-0.09	-0.03
0.04	-0.01
0.05	-0.02
-0.02	0.07
0.01	-0.14
0.02	0.01
0.05	0.04
-0.09	-0.07
-0.03	0.03
0.03	-0.02
-0.02	0.07
0.03	0.06
0.13	0
-0.12	0.01
-0.08	-0.08
0.12	0.1
0	-0.1
-0.06	0.01
0.06	0
-0.07	0.09
0.03	-0.12
-0.02	0.12
-0.07	-0.13
0.13	0.09
-0.06	-0.05
0.09	0.14
-0.09	-0.11
-0.04	-0.08
0.1	0.12
-0.01	0.01
0.01	-0.12
0.09	0.02
-0.05	0.02
-0.08	0.01
-0.05	0.01
0.02	-0.02
0.09	0.08
-0.08	-0.05
-0.06	-0.01
0	-0.07
0.02	0.05
-0.02	0.03
0.02	0
0.14	-0.02
-0.13	-0.03
0.02	0.01
-0.01	-0.03
0	-0.02
0.04	0.01
-0.03	-0.02
0.04	0.05
-0.05	0.12
0.11	-0.03
-0.08	-0.07
0.05	0.04
0.05	-0.06
-0.09	0.01
-0.05	-0.07
0.04	0.08
0.03	0.09
0.08	-0.08
-0.07	-0.02
-0.04	0.07
0.01	-0.02
0.04	-0.03
-0.02	-0.06
-0.03	0.01
-0.02	0.08
0.03	-0.02
0.16	0.03
-0.09	-0.09
-0.01	0.08
-0.1	-0.03
0.1	0
0.01	0.08
-0.07	-0.05
0.05	-0.04
-0.09	0.01
0.11	0.01
-0.05	0.11
0.07	-0.13
-0.04	-0.01
-0.06	0.01
0.04	-0.06
0.12	0.13
-0.16	-0.13
0.02	0.06
0.03	-0.07
-0.02	0.14
-0.04	-0.11
0.09	0.09
0.06	-0.01
-0.16	0
0.08	-0.04
-0.04	-0.07
0.15	0.11
-0.09	-0.02
0.03	-0.05
-0.04	0.14
-0.04	-0.04
0.03	-0.06
-0.01	-0.02
0.01	0.03
-0.09	-0.04
0.09	0.11
0.1	-0.1
-0.08	0.05
-0.06	-0.08
0.11	0.05
0.04	0.01
-0.1	-0.08
0.02	0.03
0.01	-0.03
0.04	0.08
-0.11	0.02
-0.01	0
0.08	0.02
-0.05	-0.07
-0.04	0.05
0.13	0.04
-0.08	-0.06
0.01	-0.06
0.05	0.05
-0.02	0.01
-0.03	0
0	-0.02
-0.03	-0.04
0.02	0.05
0.07	-0.06
-0.04	0.03
-0.06	0.06
0.11	-0.03
-0.13	-0.05
0.09	0.07
-0.09	0.06
0.06	-0.1
0.08	0.02
-0.1	0.03
0.01	-0.11
0.01	0.11
-0.01	0.03
0	-0.07
0.02	-0.04
0.01	0.08
-0.02	0
-0.04	0.1
0	-0.01
0.07	-0.19
-0.02	0.12
0.06	-0.03
-0.12	0.03
-0.02	-0.14
0.02	0.13
0.11	-0.08
-0.01	0.04
0.01	-0.02
-0.12	0.02
0.06	0.05
0.09	-0.01
-0.03	-0.03
-0.01	-0.09
-0.11	0.03
0.11	0.04
-0.08	0.03
0	-0.06
0.04	0.05
0	-0.01
-0.03	-0.05
0.05	0.01
0.03	0
-0.08	0.01
-0.01	0.05
0.08	-0.06
-0.12	-0.04
0.05	0.1
0.03	-0.09
0.01	0.04
-0.1	0.02
0.11	-0.07
-0.03	0.07
-0.08	-0.04
0.1	0.07
-0.03	-0.06
0.1	0
-0.15	0.07
0.08	-0.03
-0.06	0.04
0.02	0.04
-0.02	-0.11
0.03	0.11
-0.02	-0.15
0	0.05
0.09	0.1
-0.09	-0.1
0.2	0.03
0.04	0.02
-0.07	-0.09
0	0.05
0.14	0.02
-0.15	-0.09
-0.02	0.02
0	0.03
0.03	0.11
0.04	-0.11
-0.04	-0.01
0.04	0.16
-0.04	-0.1
0.09	0.03
-0.06	0.05
-0.05	-0.04
0.06	-0.05
0.14	-0.09
-0.13	0.12
-0.01	-0.11
0.09	0.06
-0.08	-0.05
0.04	0.02
-0.07	0.09
0.04	-0.07
0	0.25
-0.03	-0.26
0.04	0
0.05	0.11
-0.01	-0.04
-0.11	-0.01
0.15	0.06
-0.19	-0.01
0.14	-0.15
0.02	0.09
-0.07	0
0	0.08
-0.03	-0.1
0.02	0.04
0.01	0.03
-0.05	-0.14
0	0.13
0.11	-0.1
-0.11	0.12
0.1	-0.08
-0.11	0.06
0.11	-0.06
-0.07	-0.02
0	0.15
0.01	-0.19
-0.03	0.15
0.13	-0.09
-0.09	0.03
0.02	-0.02
0.03	-0.04
0.02	0.15
-0.09	-0.17
0.03	0.05
-0.02	-0.02
0	0.06
-0.04	-0.12
0.09	0.04
-0.02	0.1
-0.06	-0.08
0.04	0.05
0.09	0.03
-0.17	-0.04
0.03	0
0.11	0.04
-0.06	-0.02
0.01	-0.09
-0.03	0.04
0.01	-0.05
0	0.02
0	0.01
0.07	0.02
-0.02	0.02
-0.02	-0.04
0.13	-0.02
-0.19	0.02
0	0.07
0.04	-0.03
-0.06	0.02
0.09	-0.06
-0.1	0.06
0.05	-0.08
0	0.05
0.09	-0.02
-0.08	0.02
-0.02	-0.01
0.04	-0.05
0	0.09
0.02	0.02
-0.01	-0.14
-0.06	0.1
0.06	-0.03
-0.03	0
0.02	0.04
0.14	-0.11
-0.12	0.01
-0.05	0.1
0.01	-0.07
0.08	0.21
-0.09	-0.17
0.1	0.01
-0.08	0.01
0.07	-0.02
-0.07	0.09
0.01	-0.04
-0.01	0
0.04	0
0	-0.07
0.02	-0.02
-0.07	0.12
-0.02	-0.02
0	-0.1
0	0.06
0.03	0.04
-0.06	-0.09
0.05	0.1
0.15	-0.04
-0.16	-0.05
0	0.07
0.08	-0.13
0.01	0.08
-0.12	0.05
0.06	-0.06
-0.06	0.06
-0.88	-0.05
-0.96	-0.05
-0.61	0.03
-0.01	0
-0.1	-0.04
0.09	0.04
0	-0.05
0.01	0.13
0.03	-0.03
-0.05	0.05
-0.05	-0.06
0.12	0.04
-0.08	-0.1
-0.03	-0.03
-0.02	0.13
0.07	-0.02
0.03	-0.09
0.02	0.04
-0.11	0.04
0.02	-0.04
-0.01	-0.03
0.03	0.05
0.06	0.05
0	-0.02
-0.04	-0.01
0.01	-0.05
0.07	-0.03
-0.14	0.02
0.02	0.06
0.05	0.01
-0.05	-0.08
0.1	0.02
-0.01	0
-0.05	-0.04
-0.06	0
0.06	0.14
0.06	-0.04
-0.09	0.03
0	-0.01
0.02	-0.01
-0.02	-0.11
0.07	0.03
-0.1	0.04
0.02	0
0.08	-0.08
-0.03	0.12
-0.05	0
-0.04	-0.05
0.12	-0.03
-0.12	-0.02
0.14	0
-0.11	0.07
0.05	0.12
0.04	-0.21
-0.01	0.12
0.01	-0.01
-0.08	-0.07
0.09	0
0.05	0.13
-0.17	-0.13
0.11	-0.04
-0.05	0.08
-0.06	0.05
0.1	-0.03
0.04	-0.08
-0.14	0.08
0.11	0.02
-0.02	-0.07
-0.05	0.05
0.11	-0.02
-0.09	-0.01
0.02	0.01
0.02	0.03
-0.08	0
0.09	0.05
-0.05	-0.1
-0.02	0.01
0.07	0.04
-0.04	0.04
-0.01	-0.01
0.08	-0.08
-0.01	0.05
-0.04	0.08
-0.01	-0.13
-0.07	0
0.08	-0.04
0.05	0.11
-0.01	-0.07
0.02	0.05
-0.07	0.02
-0.02	-0.01
0.07	-0.08
-0.13	0.16
0.06	-0.1
0.01	-0.04
0.03	-0.03
-0.02	0.07
0.09	-0.03
-0.05	-0.03
-0.01	0.09
-0.03	-0.05
0.01	0.04
-0.01	-0.01
-0.01	-0.04
0.01	-0.04
-0.02	0.06
-0.01	-0.01
0.02	-0.01
0.03	0.09
0.02	-0.04
-0.06	-0.07
0.04	0.11
-0.05	-0.04
-0.02	-0.12
0.07	0.18
-0.05	-0.07
0.05	0
-0.01	-0.01
0.03	-0.04
-0.01	0.11
-0.01	-0.11
-0.01	0.04
-0.05	-0.03
0.1	-0.05
-0.07	0.11
0.08	-0.01
-0.08	-0.08
0.05	0
0.11	0.08
0.06	-0.07
0.02	0
-0.01	0.18
-0.03	-0.14
-0.02	0.02
0.01	-0.02
0.01	0.02
-0.05	0.01
0.14	-0.1
0.01	0.09
-0.08	-0.04
0	-0.03
-0.01	-0.04
-0.06	0.11
0.11	-0.01
0.01	-0.03
-0.04	0.01
-0.04	-0.02
0.07	0.05
-0.09	-0.07
-0.03	-0.04
0.15	0.12
-0.11	-0.04
0	-0.08
0.03	0.12
0.04	-0.03
-0.04	0
-0.05	0
0.08	-0.05
-0.07	0.07
-0.04	0.01
0.11	0.01
0.02	-0.07
-0.1	0.04
-0.01	-0.03
0.04	0
-0.06	0.05
0	-0.09
0.13	0.04
-0.04	0.01
-0.03	-0.03
0.06	0.01
-0.01	0
-0.09	0
0.12	0.07
-0.09	-0.12
-0.01	0.06
-0.03	-0.06
0.09	0.06
-0.05	0.04
0.01	-0.09
0.02	0.08
0.03	0.1
-0.08	-0.17
0.01	-0.02
0.04	0.08
0.03	-0.1
-0.08	0.1
-0.01	-0.04
0.01	-0.01
-0.03	-0.01
0.05	0.09
0.03	-0.02
0.02	-0.05
0.02	0
-0.07	0
0.08	0.02
-0.05	-0.05
-0.05	0.06
0.06	0
-0.08	-0.02
0.16	0.01
-0.06	-0.01
0.04	-0.03
-0.11	0.06
0.15	0
-0.08	-0.02
0.03	-0.08
-0.11	0.1
0.1	-0.04
-0.12	0.03
0	-0.01
0.04	0.06
0.06	-0.04
-0.03	-0.09
-0.07	0.06
0.08	-0.06
0	0.15
0.05	-0.01
-0.14	-0.09
0.06	0.08
0.04	-0.06
-0.05	-0.03
0.01	0.12
0.02	-0.07
-0.03	0.03
0.09	-0.08
-0.09	0.06
0.04	0.11
0.05	-0.1
0.08	-0.06
-0.16	-0.01
0.03	0.08
-0.04	-0.09
0.12	0.05
-0.1	-0.01
-0.01	-0.04
0.06	0.08
-0.04	-0.1
0.02	0.09
-0.03	-0.05
0.05	0.05
0	0.02
0.02	-0.11
-0.08	0.02
0.03	-0.02
0.02	0.11
-0.06	-0.02
0	0.04
0.09	0.01
-0.06	-0.07
0.03	-0.03
0.12	0.12
-0.12	-0.08
0.11	-0.08
-0.05	0.22
-0.05	-0.1
-0.07	0.01
0.03	-0.09
0.09	-0.04
-0.1	0.07
0	-0.05
0.08	0.06
-0.06	-0.02
0.04	0.05
-0.01	0
0.09	-0.1
-0.09	-0.02
-0.05	0.18
0.08	-0.09
-0.08	0
0.06	-0.06
-0.07	0.15
0.18	-0.13
-0.12	0
0.04	-0.01
-0.1	0.01
0.01	0.05
0.11	-0.03
-0.03	-0.01
-0.02	0.01
-0.03	0.01
0.11	0.03
-0.01	-0.08
-0.09	-0.03
-0.05	0.08
0.01	0.04
0.03	0.01
0	0.01
0.04	-0.03
-0.01	0.02
0.04	-0.07
0	0.06
0	-0.03
-0.05	0.05
0	-0.08
-0.04	0.02
0.01	0
0.08	0.08
-0.04	-0.09
0.11	0.01
-0.09	0.07
0.06	-0.11
-0.1	0.04
0.01	0.04
-0.02	-0.06
0.05	-0.05
-0.03	0.03
0.07	0.04
-0.07	-0.04
-0.07	-0.04
0.09	0.12
-0.04	0
-0.05	-0.08
0.13	-0.02
0.01	0.06
-0.03	-0.04
0	0.07
-0.07	-0.09
-0.03	0.08
0.12	-0.05
-0.01	0.06
0.02	-0.01
-0.12	-0.1
0.01	0.04
0	0.04
0.08	-0.01
0.03	0.03
-0.03	-0.07
-0.05	0.05
0.06	-0.04
-0.07	0.06
0.07	0.04
-0.08	-0.03
0.1	-0.08
0	0.11
-0.11	-0.13
0.04	0.12
-0.01	-0.12
-0.02	0.04
-0.01	0.08
0.06	-0.03
0.06	-0.02
-0.05	0.05
0.03	-0.07
-0.02	0
-0.04	0.03
-0.01	-0.02
0.01	-0.03
0.1	-0.02
-0.01	0.11
-0.05	-0.08
0.02	0.06
-0.1	0.03
0.1	-0.08
0	0.04
0	-0.01
-0.1	0.08
0.03	-0.14
0.06	0.07
-0.06	-0.06
-0.01	-0.02
-0.01	0.11
-0.01	-0.07
0.03	-0.06
0.1	0.02
-0.06	0.05
0	-0.06
0.05	0.1
-0.08	-0.03
0.04	0.02
0.06	-0.06
-0.06	0.07
0.05	0.08
-0.12	-0.1
0.04	-0.04
0.07	0.01
-0.05	0.06
-0.01	0.03
-0.01	-0.06
0.11	-0.09
-0.03	0.13
-0.08	-0.08
0.06	0.02
-0.09	0.01
0.23	-0.05
0.04	0.02
0.01	0.01
-0.11	0.09
0.02	-0.13
0.04	0.15
-0.05	-0.08
0.01	0.01
0	-0.1
0.06	0.1
-0.01	0.04
0	-0.02
0.08	-0.07
-0.11	-0.06
0.01	0
-0.01	0.11
0	-0.05
0	0.1
-0.04	-0.14
0.09	0.15
-0.07	0
0.01	-0.07
0.01	-0.04
0.01	0.14
0.02	-0.11
-0.01	-0.03
0.07	0.03
-0.12	-0.06
0.08	0.19
0.03	-0.1
0	-0.01
0.07	-0.07
-0.06	0.04
-0.04	-0.01
-0.01	0.05
-0.08	-0.11
0.08	0.08
0	-0.09
0.03	0.11
-0.01	-0.04
-0.08	0
0.06	0
-0.01	0.02
0	-0.03
-0.05	-0.04
0.08	-0.02
0.04	0.02
-0.13	0.05
0.1	0.06
0	-0.04
-0.01	0.05
-0.02	0.02
-0.01	-0.01
-0.05	-0.09
0.09	0.07
-0.09	-0.09
-0.01	0.06
0.06	-0.06
0.05	0.03
-0.07	0.02
0.04	0.08
-0.06	-0.14
-0.02	0.04
0.03	-0.01
0.13	0.02
-0.13	0.05
0.07	-0.12
0.02	0.06
-0.12	0.08
0.01	-0.05
0.1	0.02
0.02	-0.07
-0.07	0.04
0.13	-0.05
-0.05	0.05
[truncated: 14,383 more rows]

## Sheet: INL
Before calibration	After calibration
5.44	-0.03
5.37	-0.03			MAX	MIN
5.41	0.09		Before calibration	6.78	0.52
5.34	-0.04		After calibration	0.23	-0.1
5.4	-0.05
5.29	-0.01
5.39	0
5.34	0.03
5.38	0.01
5.33	-0.03
5.42	0.02
5.39	-0.01
5.36	-0.05
5.38	-0.02
5.31	-0.07
5.4	-0.05
5.46	-0.04
5.35	0.05
5.32	0.03
5.37	-0.06
5.48	-0.01
5.39	-0.07
5.32	0
5.36	-0.03
5.36	-0.02
5.36	-0.03
5.41	-0.05
5.37	0.04
5.4	0.01
5.3	0
5.33	-0.06
5.36	0.09
5.39	-0.03
5.42	-0.05
5.32	0.01
5.37	-0.03
5.34	0
5.41	-0.05
5.34	-0.01
5.36	0.04
5.47	-0.01
5.44	-0.01
5.47	-0.05
5.42	0.03
5.3	-0.06
5.49	-0.06
5.39	-0.07
5.44	-0.03
5.36	0
5.35	-0.02
5.43	0.04
5.35	-0.06
5.37	0
5.33	-0.01
5.43	-0.03
5.45	0
5.31	0.07
5.42	0
5.34	-0.03
5.36	0.03
5.39	-0.03
5.36	-0.03
5.36	0
5.33	-0.07
5.44	-0.09
5.41	-0.06
5.35	-0.01
5.35	0.02
5.39	0.11
5.36	0.09
5.34	0
5.34	0.16
5.38	-0.07
5.31	0.12
5.38	-0.02
5.32	-0.04
5.39	0.03
5.43	0.03
5.44	0.06
5.33	0.05
5.42	0.04
5.33	-0.08
5.35	-0.03
5.32	0.04
5.45	0.07
5.35	-0.06
5.35	0.12
5.33	0.04
5.43	0
5.38	-0.01
5.36	-0.02
5.43	0.05
5.38	-0.05
5.33	0.07
5.35	0.04
5.42	0.01
5.38	0.04
5.53	-0.05
5.44	0.01
5.45	0.07
5.34	-0.05
5.4	-0.01
5.4	-0.04
5.39	-0.03
5.4	-0.02
5.32	-0.01
5.44	0.07
5.38	-0.05
5.39	0.02
5.39	-0.06
5.42	-0.03
5.41	-0.07
5.47	0.03
5.37	0.01
5.39	-0.03
5.43	0.01
5.38	-0.04
5.49	-0.04
5.38	0.06
5.4	-0.07
5.41	0.01
5.39	0.02
5.38	0.05
5.32	0.04
5.32	-0.07
5.33	-0.05
5.36	0.01
5.34	-0.07
5.41	-0.02
5.43	0.1
5.43	-0.06
5.36	0.04
5.51	-0.03
5.37	0
5.37	0.07
5.44	0.01
5.36	0.1
5.44	0.01
5.38	-0.01
5.4	-0.02
5.42	-0.08
5.36	-0.08
5.44	0.04
5.39	-0.06
5.43	0.07
5.43	-0.04
5.35	0.04
5.46	-0.06
5.32	-0.06
5.34	0.04
5.48	0
5.4	-0.02
5.37	-0.04
5.43	0.05
5.43	-0.06
5.36	-0.01
5.39	0.07
5.38	-0.04
5.34	-0.03
5.35	0.08
5.47	-0.03
5.32	0
5.44	-0.03
5.47	-0.03
5.39	-0.04
5.35	0.14
5.35	-0.05
5.44	-0.02
5.41	-0.04
5.38	0.02
5.46	-0.07
5.4	0.02
5.44	-0.02
5.47	0.06
5.36	-0.06
5.48	0.01
5.41	-0.06
5.45	-0.01
5.53	0.04
5.46	-0.02
5.33	0.03
5.33	0.01
5.46	0.08
5.36	0.01
5.37	-0.04
5.37	0.01
5.37	0.04
5.49	0.06
5.39	-0.03
5.41	0.01
5.41	-0.08
5.42	0.07
5.37	0.12
5.4	0.03
5.39	0.02
5.4	-0.06
5.42	-0.07
5.36	0
5.43	0.16
5.42	-0.04
5.41	0.03
5.33	0.1
5.45	-0.01
5.39	-0.02
5.37	0.12
5.36	-0.06
5.44	0.06
5.41	0
5.45	0.05
5.38	-0.08
5.42	-0.03
5.38	-0.03
5.4	-0.03
5.41	0.03
5.36	0.01
5.37	-0.01
5.37	-0.02
5.44	0
5.41	-0.01
5.38	-0.04
5.37	0
5.39	0
5.38	0.02
5.4	0.01
5.48	0.04
5.44	-0.05
5.43	-0.03
5.52	-0.02
5.46	-0.03
5.47	0.01
5.45	0.04
5.47	0.1
5.39	-0.04
5.37	-0.03
5.43	-0.02
5.34	0.1
5.39	-0.05
5.41	-0.07
5.43	0.05
5.39	-0.05
5.43	-0.03
5.48	0.01
5.45	0.03
5.48	0.01
5.5	-0.08
5.45	-0.02
5.34	0.04
5.42	0.09
5.44	0.01
5.35	-0.02
5.38	0.04
5.41	0.01
5.38	0.09
5.42	-0.06
5.44	0.07
5.49	0.01
5.4	-0.04
5.41	0.01
5.44	0.11
5.46	0.03
5.44	-0.04
5.46	0.03
5.37	-0.02
5.42	0.01
5.4	-0.01
5.35	0.04
5.51	0.04
5.47	0.07
5.44	-0.02
5.4	0.02
5.35	0
5.49	-0.02
5.44	0
5.38	0.03
5.51	-0.01
5.46	-0.04
5.45	0.06
5.47	0.03
5.47	0.03
5.43	-0.02
5.37	-0.02
5.44	-0.01
5.47	-0.06
5.44	-0.04
5.38	-0.05
5.39	0.03
5.34	0.02
5.41	-0.04
5.63	0.03
5.4	-0.03
5.45	-0.03
5.37	0.01
5.37	-0.03
5.45	0.04
5.47	0.02
5.37	-0.09
5.51	-0.01
5.42	0.06
5.52	-0.05
5.5	0.04
5.42	-0.02
5.46	0.02
5.49	0
5.38	0.09
5.42	-0.01
5.41	-0.03
5.46	0.07
5.48	-0.01
5.39	-0.01
5.4	-0.07
5.42	-0.04
5.36	0.06
5.41	-0.03
5.54	0
5.4	0.07
5.45	0.01
5.44	-0.03
5.48	-0.05
5.46	-0.03
5.53	-0.02
5.43	0
5.44	-0.06
5.41	0.02
5.51	-0.03
5.48	0.04
5.46	0.06
5.44	0.02
5.46	0.02
5.38	0
5.42	-0.05
5.4	0.02
5.45	-0.06
5.46	-0.07
5.41	0.04
5.39	-0.01
5.44	-0.01
5.49	0.13
5.42	0.04
5.57	0.03
5.43	0.01
5.48	0
5.41	-0.01
5.36	0.02
5.45	-0.03
5.38	-0.06
5.39	-0.01
5.46	-0.01
5.43	0.05
5.49	0.06
5.48	0.05
5.44	-0.05
5.39	0.05
5.46	0.02
5.4	-0.05
5.52	-0.03
5.44	-0.01
5.44	-0.02
5.51	-0.02
5.48	0.01
5.42	0.02
5.39	-0.01
5.44	0
5.42	-0.04
5.4	-0.02
5.5	0.07
5.36	-0.02
5.41	-0.08
5.38	0.05
5.46	0.03
5.45	-0.08
5.48	-0.08
5.49	0.02
5.42	-0.02
5.42	0.03
5.38	-0.03
5.43	-0.05
5.45	-0.06
5.45	0.07
5.45	0.09
5.43	-0.07
5.59	-0.03
5.45	-0.03
5.43	-0.07
5.47	-0.08
5.49	0.07
5.43	-0.03
5.57	0
5.5	0.01
5.75	0.06
5.65	0.01
5.61	-0.02
5.61	-0.02
5.68	0.12
5.62	-0.08
5.66	0.05
5.6	0
5.7	0.12
5.69	-0.06
5.59	0.01
5.62	0.02
5.58	-0.02
5.65	0
5.8	-0.04
5.66	-0.03
5.71	-0.04
5.66	-0.04
5.57	0.03
5.58	-0.03
5.66	-0.04
5.58	-0.01
5.57	-0.05
5.58	-0.04
5.56	-0.01
5.61	-0.05
5.75	0.04
5.63	-0.06
5.71	-0.02
5.6	-0.07
5.61	-0.03
5.66	0.03
5.64	0
5.66	0
5.66	-0.02
5.61	-0.02
5.59	-0.04
5.66	-0.01
5.6	-0.01
5.69	-0.03
5.63	-0.04
5.59	0.03
5.63	0.09
5.64	-0.03
5.62	-0.04
5.62	-0.02
5.67	0.01
5.59	0.05
5.64	-0.02
5.6	-0.01
5.65	0.05
5.64	-0.01
5.68	-0.02
5.64	-0.07
5.74	0
5.58	0.06
5.66	0.1
5.57	0.08
5.62	-0.01
5.65	-0.03
5.58	-0.03
5.67	0.02
5.57	-0.08
5.67	0
5.66	-0.06
5.63	-0.01
5.69	-0.01
5.58	0.02
5.68	-0.07
5.6	0.15
5.58	0.01
5.64	-0.04
5.67	-0.07
5.64	0.08
5.62	-0.02
5.66	-0.04
5.64	0.05
5.61	0
5.69	-0.03
5.68	-0.03
5.61	0.01
5.7	0.05
5.63	0.02
5.66	-0.07
5.73	0
5.7	-0.03
5.62	0.03
5.73	0.03
5.66	-0.06
5.6	0.02
5.67	0.06
5.6	0.04
5.63	0.06
5.68	-0.06
5.6	-0.05
5.61	-0.04
5.57	0.06
5.67	0.05
5.61	-0.03
5.61	0.01
5.67	-0.04
5.59	0
5.66	0.09
5.63	0.05
5.64	-0.06
5.62	0.01
5.6	-0.07
5.61	0.03
5.68	-0.05
5.68	0.03
5.69	0.02
5.64	0.03
5.65	-0.06
5.61	0.07
5.68	0.02
5.66	0.05
5.63	0.02
5.69	0.06
5.63	0.01
5.65	0
5.59	-0.02
5.62	0.08
5.59	-0.02
5.61	0.16
5.66	0.07
5.72	-0.04
5.64	0.02
5.62	0.01
5.62	-0.02
5.61	-0.04
5.6	0.03
5.67	-0.03
5.7	-0.04
5.72	-0.06
5.66	0.12
5.69	-0.02
5.68	0.05
5.68	-0.01
5.66	-0.07
5.71	-0.06
5.69	-0.02
5.61	0.02
5.64	0.02
5.71	0.17
5.59	0.03
5.65	-0.02
5.66	0.05
5.75	-0.01
5.6	-0.03
5.66	0.01
5.64	0.08
5.66	-0.02
5.68	0.03
5.69	0.06
5.63	0.02
5.66	-0.06
5.75	-0.01
5.75	-0.02
5.6	0.03
5.75	-0.02
5.64	-0.02
5.59	0.02
5.63	0.11
5.67	0.01
5.67	-0.02
5.67	-0.03
5.73	0.01
5.74	-0.03
5.68	0.01
5.66	0.04
5.63	-0.03
5.65	-0.02
5.76	-0.06
5.67	0.01
5.63	0.07
5.63	-0.04
5.73	0.04
5.6	-0.06
5.67	-0.02
5.77	0.05
5.61	-0.04
5.63	-0.02
5.67	0.07
5.59	-0.02
5.59	-0.03
5.61	0.01
5.65	0.04
5.73	-0.03
5.67	-0.06
5.63	-0.01
5.71	0.03
5.64	0.03
5.72	0
5.69	-0.04
5.64	-0.03
5.65	0.06
5.6	0.04
5.62	0.02
5.69	-0.03
5.74	0.03
5.66	0
5.69	-0.06
5.69	-0.01
5.61	-0.04
5.63	0.02
5.74	0.08
5.7	0
5.75	-0.01
5.62	0
5.67	-0.04
5.65	-0.02
5.63	0.07
5.68	-0.06
5.71	0
5.72	-0.05
5.78	-0.04
5.62	-0.01
5.69	-0.02
5.73	0.02
5.7	-0.08
5.72	0.1
5.73	-0.03
5.77	0.03
5.73	-0.07
5.71	-0.06
5.71	0.01
5.66	0.01
5.67	0
5.76	0
5.7	0.1
5.7	0.03
5.75	-0.06
5.67	-0.06
5.67	0.02
5.66	0.02
5.69	-0.02
5.65	-0.02
5.72	0
5.64	0.03
5.69	0.01
5.71	-0.04
5.65	0
5.66	0.09
5.76	-0.05
5.68	-0.02
5.65	-0.04
5.78	-0.02
5.62	0.03
5.63	-0.07
5.69	0.01
5.7	-0.01
5.63	0.05
5.7	-0.06
5.69	-0.02
5.75	-0.03
5.69	-0.02
5.79	-0.06
5.87	-0.07
5.91	-0.01
5.82	-0.03
5.83	0.02
5.86	-0.01
5.94	0.02
5.94	-0.03
5.9	0.05
5.8	0.05
5.82	-0.02
5.87	-0.04
5.85	0.07
5.82	-0.06
5.88	-0.02
5.88	-0.04
5.86	0.01
5.82	0.04
5.85	0.05
5.85	-0.02
5.87	0.1
5.91	0.05
5.86	-0.02
5.92	0.05
5.79	-0.06
5.96	-0.05
5.81	-0.01
5.8	0.07
5.85	0.02
5.98	0.06
5.81	0.06
5.88	0.05
5.84	-0.04
5.86	-0.05
5.85	-0.05
6.07	0
5.94	0.01
5.88	-0.04
5.92	0.04
5.93	0.01
5.86	-0.01
5.8	0.08
5.86	0.02
5.82	0.01
5.89	0.06
5.85	0.02
5.92	0.05
5.85	-0.03
5.83	0.09
5.95	-0.08
5.86	0.01
5.88	0.12
5.86	-0.03
5.85	-0.01
5.89	0.05
5.91	-0.01
5.81	0.02
5.92	0.13
5.98	-0.04
5.79	0.09
5.81	-0.07
5.88	0.05
5.95	-0.04
5.89	0
5.79	0.02
5.82	-0.01
5.81	-0.08
5.83	-0.03
5.84	-0.05
5.94	0
5.84	-0.08
5.97	0.01
5.83	0.02
5.85	-0.05
5.89	0.08
5.8	-0.06
5.89	0.06
5.82	0.01
5.91	0.01
5.86	-0.07
5.82	0
5.96	-0.05
5.86	-0.01
5.94	-0.02
5.95	-0.03
5.86	-0.02
5.81	0.05
5.86	0.04
5.85	0.09
5.84	0.01
5.9	0.08
5.87	-0.03
5.82	-0.02
5.94	-0.03
5.8	0
5.81	0.04
5.82	0.03
5.93	-0.01
5.84	0.03
5.91	-0.05
5.92	-0.05
5.81	0.04
5.85	0.04
5.91	-0.05
5.87	-0.03
5.84	0.06
5.86	0
5.88	-0.04
5.84	0.01
5.8	-0.01
5.92	0.07
5.91	-0.03
5.8	-0.05
5.91	-0.03
5.94	0.05
5.84	0.03
5.93	0.11
5.98	0.04
5.88	-0.01
5.91	0.06
6.08	0.07
5.88	0.04
5.96	-0.05
5.89	-0.02
5.87	0.04
5.98	-0.06
5.99	0.09
5.86	0
5.93	-0.04
5.89	-0.02
5.86	0
5.92	0.01
5.92	0.07
5.86	0.09
5.96	-0.07
5.99	0.12
6	0.02
5.93	-0.01
5.9	-0.05
5.92	-0.03
5.94	-0.04
5.86	-0.01
5.94	0
5.94	0.01
5.85	0.14
5.92	0
5.86	0.02
5.86	0.07
6.06	-0.05
5.9	0.02
6.04	0.03
5.9	-0.05
5.91	-0.01
5.85	-0.02
5.92	0.09
5.88	-0.07
5.93	0.04
5.98	0.09
5.97	0.09
5.89	-0.02
5.96	0.04
5.9	0.01
5.92	-0.02
5.9	-0.02
5.97	-0.03
5.96	0.02
5.94	-0.04
5.99	-0.08
6	0.03
6	0.02
6	0.01
5.86	-0.04
5.95	-0.01
5.99	-0.01
5.9	0.05
5.94	0.06
5.93	0.01
5.89	-0.06
5.88	-0.05
5.92	0.05
5.89	0.01
5.88	-0.04
5.93	0
5.89	-0.05
6	-0.01
5.97	0.06
5.89	-0.04
5.92	-0.05
5.91	-0.07
5.85	0.05
6.03	0
5.89	-0.03
5.9	0.02
5.87	0.01
5.92	0.04
5.91	-0.07
5.87	0.03
5.96	-0.05
5.89	0.04
5.95	0.02
5.95	0.08
5.87	0.03
6.03	-0.01
5.97	-0.01
5.95	-0.06
6.06	-0.05
5.91	-0.01
6.07	-0.03
5.93	0.03
5.95	-0.03
6.05	0.03
5.85	0.06
6.03	-0.02
5.92	0.14
6.05	-0.05
6.07	0.03
5.96	0.05
5.96	-0.01
5.94	0.03
5.93	-0.04
6.04	0.05
5.96	0.07
5.89	-0.04
5.91	0.03
6.01	0.01
6.06	-0.01
5.94	0.04
5.89	-0.04
5.95	0.04
6.06	-0.02
5.9	0.01
5.94	0.06
5.95	0
5.93	-0.04
5.95	-0.01
5.91	0.07
5.94	-0.03
5.91	0.02
5.96	0.04
5.89	-0.07
5.91	0.1
5.87	0.04
5.96	-0.01
5.91	-0.01
5.95	0.01
5.93	-0.07
5.89	0.02
5.98	0.06
5.96	-0.02
6.02	0.02
5.97	-0.05
5.88	0.05
5.92	0
6.07	0
5.95	-0.04
5.95	0.02
6.2	-0.01
6.14	-0.02
6.14	0
6.11	0.07
6.13	-0.04
6.07	0.03
6.07	-0.04
6.17	0.06
6.14	-0.04
6.08	-0.08
6.1	0.01
6.11	0.05
6.14	0.03
6.15	0.02
6.08	0.1
6.05	-0.06
6.06	0.01
6.12	0
6.09	-0.02
6.12	0.03
6.16	-0.05
6.11	-0.07
6.17	0.06
6.14	-0.04
6.1	-0.03
6.15	-0.02
6.15	-0.06
6.11	0
6.06	0.06
6.06	0
6.04	0
6.08	-0.08
6.16	-0.01
6.16	-0.02
6.07	-0.03
6.09	-0.08
6.1	0.04
6.17	-0.04
6.17	0.03
6.19	-0.06
6.14	0.03
6.06	-0.01
6.2	-0.07
6.09	-0.03
6.06	0.06
6.12	0.02
6.14	-0.07
6.12	-0.02
6.12	-0.01
6.2	0.07
6.13	0.06
6.13	0.02
6.18	-0.06
6.13	0.02
6.13	-0.06
6.08	0.03
6.1	-0.02
6.1	0.03
6.15	-0.03
6.12	0.03
6.14	0
6.23	-0.02
6.09	-0.01
6.19	-0.07
6.12	0.04
6.16	-0.03
6.15	-0.03
6.1	0.01
6.15	-0.04
6.15	-0.04
6.17	0.03
6.14	-0.05
6.08	0.15
6.17	-0.04
6.09	-0.07
6.15	-0.04
6.25	0.01
6.13	-0.05
6.14	0.03
6.16	0.04
6.16	-0.01
6.17	0
6.11	0.07
6.2	0.01
6.12	0.07
6.2	-0.05
6.06	-0.02
6.13	0.01
6.21	0.06
6.23	0.07
6.14	0.12
6.13	0.06
6.15	-0.06
6.16	-0.03
6.15	0.06
6.13	-0.03
6.09	0.04
6.27	0.01
6.2	0.02
6.13	-0.03
6.17	0.1
6.12	0
6.09	-0.01
6.08	0.01
6.14	-0.05
6.11	0
6.12	-0.04
6.12	0
6.23	-0.02
6.07	-0.02
6.11	-0.06
6.11	0.08
6.09	0.02
6.09	-0.04
6.07	0.02
6.23	0.01
6.19	0
6.1	0.02
6.17	-0.02
6.08	-0.03
6.11	-0.03
6.18	-0.01
6.21	0.07
6.13	0
6.09	-0.05
6.24	0.03
6.2	0
6.19	0.01
6.06	0.09
6.19	-0.04
6.19	-0.01
6.19	0.07
6.1	-0.05
6.22	0.07
6.18	-0.03
6.1	0.03
6.12	0.04
6.11	-0.02
6.15	-0.01
6.07	-0.03
6.19	-0.04
6.11	0
6.28	0.07
6.12	-0.01
6.14	-0.05
6.14	-0.01
6.17	0.09
6.22	0.11
6.12	0.03
6.14	-0.07
6.15	-0.07
6.15	-0.04
6.15	0.13
6.23	0.08
6.23	0
6.09	-0.07
6.13	0
6.15	0.04
6.23	0.15
6.15	-0.01
6.15	-0.02
6.15	-0.04
6.17	0.07
6.11	0.06
6.1	0.03
6.17	0.07
6.15	-0.03
6.14	0
6.12	-0.01
6.2	-0.02
6.18	-0.02
6.15	-0.06
6.17	-0.05
6.22	0.02
6.22	0.05
6.23	-0.06
6.18	-0.01
6.12	-0.04
6.21	0
6.09	-0.02
6.22	0.01
6.17	-0.04
6.14	0.12
6.15	0.12
6.18	0.02
6.18	0.07
6.17	0.01
6.13	-0.02
6.09	0
6.17	-0.06
6.16	0.08
6.18	0
6.14	0.01
6.22	-0.03
6.16	0.03
6.15	-0.02
6.19	-0.08
6.12	-0.03
6.18	-0.02
6.2	0.05
6.19	0.09
6.21	-0.06
6.29	0
6.19	0
6.14	-0.04
6.13	0.05
6.18	0.05
6.12	-0.04
6.16	-0.02
6.27	0.04
6.13	-0.02
6.17	0.06
6.12	0.03
6.09	-0.06
6.16	-0.02
6.1	0.02
6.26	0.08
6.09	0.01
6.19	0.02
6.15	-0.07
6.2	-0.05
6.26	-0.05
6.2	0.04
6.18	0.06
6.16	0.01
6.15	0.04
6.12	-0.01
6.15	0.02
6.15	0.13
6.1	-0.02
6.25	0.01
6.21	0
6.26	0.02
6.12	0.09
6.1	-0.07
6.23	0.01
6.19	-0.01
6.11	0.04
6.17	0.01
6.16	-0.03
6.18	-0.04
6.17	0.01
6.37	0.01
6.15	0.02
6.21	0.01
6.25	-0.07
6.24	0.06
6.18	-0.06
6.22	0.01
6.12	0.15
6.23	-0.04
6.09	0.04
6.15	-0.02
6.14	-0.08
6.21	0.16
6.21	0.03
6.4	0.16
6.45	0.04
6.43	0.03
6.34	0.08
6.27	-0.03
6.33	0.02
6.28	0.02
6.33	-0.08
6.33	0.01
6.42	-0.03
6.42	-0.03
6.39	0.06
6.28	-0.02
6.32	0.08
6.37	-0.06
6.35	0.08
6.36	0
6.34	0.05
6.43	0.08
6.29	0.05
6.32	-0.04
6.45	0.09
6.35	-0.02
6.34	0.1
6.38	0.03
6.4	-0.05
6.35	-0.07
6.32	0
6.4	-0.04
6.31	-0.02
6.41	0
6.42	-0.06
6.41	-0.02
6.33	-0.05
6.35	0.01
6.33	-0.05
6.31	-0.03
6.35	0.02
6.38	0.07
6.38	-0.05
6.28	0.02
6.32	0
6.42	0.05
6.34	0.04
6.31	-0.01
6.42	-0.04
6.35	-0.02
6.38	0.01
6.36	-0.05
6.28	0.06
6.36	0.05
6.35	-0.07
6.4	0.05
6.33	-0.02
6.37	-0.06
6.38	-0.02
6.36	0.06
6.43	-0.03
6.38	0.05
6.29	0.05
6.42	0
6.39	0.06
6.3	0.03
6.34	0.02
6.39	0
6.37	0.07
6.38	-0.07
6.4	-0.06
6.45	-0.02
6.36	-0.09
6.33	-0.06
6.36	-0.08
6.34	-0.01
6.37	0.05
6.5	0.05
6.38	0.06
6.3	-0.02
6.42	0.08
6.42	-0.02
6.36	-0.01
6.42	-0.01
6.35	0.08
6.38	-0.04
6.36	0.08
6.29	-0.05
6.42	0.04
6.36	-0.01
6.45	0.13
6.36	0.02
6.32	-0.06
6.42	0.06
6.41	0.07
6.42	-0.05
6.51	-0.03
6.46	-0.01
6.38	0
6.33	0.01
6.35	-0.01
6.44	0.07
6.36	0.02
6.3	0.01
6.3	-0.06
6.32	-0.01
6.3	0.02
6.32	0.02
6.46	0
6.33	-0.03
6.35	-0.02
6.34	-0.05
6.34	-0.07
6.38	-0.06
6.35	-0.08
6.39	-0.03
6.34	0.09
6.45	0.06
6.37	-0.01
6.42	0.03
6.47	-0.03
6.38	-0.02
6.33	-0.09
6.37	-0.01
6.4	0.08
6.48	0
6.41	-0.02
6.37	0.05
6.38	0.03
6.42	0
6.4	-0.06
6.37	-0.05
6.35	0.03
6.38	0.01
6.54	0.04
6.45	-0.05
6.44	0.03
6.34	0
6.44	0
6.45	0.08
6.38	0.03
6.43	-0.01
6.34	0
6.45	0.01
6.4	0.12
6.47	-0.01
6.43	-0.02
6.37	-0.01
6.41	-0.07
6.53	0.06
6.37	-0.07
6.39	-0.01
6.42	-0.08
6.4	0.06
6.36	-0.05
6.45	0.04
6.51	0.03
6.35	0.03
6.43	-0.01
6.39	-0.08
6.54	0.03
6.45	0.01
6.48	-0.04
6.44	0.1
6.4	0.06
6.43	0
6.42	-0.02
6.43	0.01
6.34	-0.03
6.43	0.08
6.53	-0.02
6.45	0.03
6.39	-0.05
6.5	0
6.54	0.01
6.44	-0.07
6.46	-0.04
6.47	-0.07
6.51	0.01
6.4	0.03
6.39	0.03
6.47	0.05
6.42	-0.02
6.38	0.03
6.51	0.07
6.43	0.01
6.44	-0.05
6.49	0
6.47	0.01
6.44	0.01
6.44	-0.01
6.41	-0.05
6.43	0
6.5	-0.06
6.46	-0.03
6.4	0.03
6.51	0
6.38	-0.05
6.47	0.02
6.38	0.08
6.44	-0.02
6.52	0
6.42	0.03
6.43	-0.08
6.44	0.03
6.43	0.06
6.43	-0.01
6.45	-0.05
6.46	0.03
6.44	0.03
6.4	0.13
6.4	0.12
6.47	-0.07
6.45	0.05
6.51	0.02
6.39	0.05
6.37	-0.09
6.39	0.04
6.5	-0.04
6.49	0
6.5	-0.02
6.38	0
6.44	0.05
6.53	0.04
6.5	0.01
6.49	-0.08
6.38	-0.05
6.49	-0.01
6.41	0.02
6.41	-0.04
6.45	0.01
6.45	0
6.42	-0.05
6.47	-0.04
6.5	-0.04
6.42	-0.03
6.41	0.02
6.49	-0.04
6.37	-0.08
6.42	0.02
6.45	-0.07
6.46	-0.03
6.36	-0.01
6.47	-0.08
6.44	-0.01
6.36	-0.05
6.46	0.02
6.43	-0.04
6.53	-0.04
6.38	0.03
6.46	0
6.4	0.04
6.42	0.08
6.4	-0.03
6.43	0.08
6.41	-0.07
6.41	-0.02
6.5	0.08
6.41	-0.02
6.61	0.01
6.65	0.03
6.58	-0.06
6.58	-0.01
6.72	0.01
6.57	-0.08
6.55	-0.06
6.55	-0.03
6.58	0.08
6.62	-0.03
6.58	-0.04
6.62	0.12
6.58	0.02
6.67	0.05
6.61	0.1
6.56	0.06
6.62	0.01
6.76	-0.08
6.63	0.04
6.62	-0.07
6.71	-0.01
6.63	-0.06
6.67	-0.04
6.6	0.05
6.64	-0.02
6.64	0.23
6.61	-0.03
6.65	-0.03
6.7	0.08
6.69	0.04
6.58	0.03
6.73	0.09
6.54	0.08
6.68	-0.07
6.7	0.02
6.63	0.02
6.63	0.1
6.6	0
6.62	0.04
6.63	0.07
6.58	-0.07
6.58	0.06
6.69	-0.04
6.58	0.08
6.68	0
6.57	0.06
6.68	0
6.61	-0.02
6.61	0.13
6.62	-0.06
6.59	0.09
6.72	0
6.63	0.03
6.65	0.01
6.68	-0.03
6.7	0.12
6.61	-0.05
6.64	0
6.62	-0.02
6.62	0.04
6.58	-0.08
6.67	-0.04
6.65	0.06
6.59	-0.02
6.63	0.03
6.72	0.06
6.55	0.02
6.58	0.02
6.69	0.06
6.63	0.04
6.64	-0.05
6.61	-0.01
6.62	-0.06
6.62	-0.04
6.62	-0.03
6.69	-0.01
6.67	0.01
6.65	-0.03
6.78	-0.05
6.59	-0.03
6.59	0.04
6.63	0.01
6.57	0.03
6.66	-0.03
6.56	0.03
6.61	-0.05
6.61	0
6.7	-0.02
6.62	0
6.6	-0.01
6.64	-0.06
6.64	0.03
6.66	0.05
6.65	-0.09
6.59	0.01
6.65	-0.02
6.62	-0.02
6.64	0.02
6.78	-0.09
6.66	-0.08
6.61	0.02
6.62	-0.05
6.7	0.16
6.61	-0.01
6.71	0
6.63	0.01
6.7	-0.01
6.63	0.08
6.64	0.04
6.63	0.04
6.67	0.04
6.67	-0.03
6.69	-0.05
6.62	0.07
6.6	0.05
6.6	-0.05
6.6	0.01
6.63	0.05
6.57	-0.04
6.62	0.06
6.77	0.02
6.61	-0.03
6.61	0.04
6.69	-0.09
6.7	-0.01
6.58	0.04
6.64	-0.02
6.58	0.04
5.7	-0.01
4.74	-0.06
4.13	-0.03
4.12	-0.03
4.02	-0.07
4.11	-0.03
4.11	-0.08
4.12	0.05
4.15	0.02
4.1	0.07
4.05	0.01
4.17	0.05
4.09	-0.05
4.06	-0.08
4.04	0.05
4.11	0.03
4.14	-0.06
4.16	-0.02
4.05	0.02
4.07	-0.02
4.06	-0.05
4.09	0
4.15	0.05
4.15	0.03
4.11	0.02
4.12	-0.03
4.19	-0.06
4.05	-0.04
4.07	0.02
4.12	0.03
4.07	-0.05
4.17	-0.03
4.16	-0.03
4.11	-0.07
4.05	-0.07
4.11	0.07
4.17	0.03
4.08	0.06
4.08	0.05
4.1	0.04
4.08	-0.07
4.15	-0.04
4.05	0
4.07	0
4.15	-0.08
4.12	0.04
4.07	0.04
4.03	-0.01
4.15	-0.04
4.03	-0.06
4.17	-0.06
4.06	0.01
4.11	0.13
4.15	-0.08
4.14	0.04
4.15	0.03
4.07	-0.04
4.16	-0.04
4.21	0.09
4.04	-0.04
4.15	-0.08
4.1	0
4.04	0.05
4.14	0.02
4.18	-0.06
4.04	0.02
4.15	0.04
4.13	-0.03
4.08	0.02
4.19	0
4.1	-0.01
4.12	0
4.14	0.03
4.06	0.03
4.15	0.08
4.1	-0.02
4.08	-0.01
4.15	0.03
4.11	0.07
4.1	0.06
4.18	-0.02
4.17	0.03
4.13	0.11
4.12	-0.02
4.05	-0.02
4.13	-0.06
4.18	0.05
4.17	-0.02
4.19	0.03
4.12	0.05
4.1	0.04
4.17	-0.04
4.04	0.12
4.1	0.02
4.11	-0.02
4.14	-0.05
4.12	0.02
4.21	-0.01
4.16	-0.04
4.15	0.05
4.12	0
4.13	0.04
4.12	0.03
4.11	-0.01
4.12	-0.05
4.1	0.01
4.09	0
4.11	-0.01
4.14	0.08
4.16	0.04
4.1	-0.03
4.14	0.08
4.09	0.04
4.07	-0.08
4.14	0.1
4.09	0.03
4.14	0.03
4.13	0.02
4.16	-0.02
4.15	0.09
4.14	-0.02
4.13	0.02
4.08	-0.01
4.18	-0.06
4.11	0.05
4.19	0.04
4.11	-0.04
4.16	-0.04
4.27	0.04
4.33	-0.03
4.35	-0.03
4.34	0.15
4.31	0.01
4.29	0.03
4.3	0.01
4.31	0.03
4.26	0.04
4.4	-0.06
4.41	0.03
4.33	-0.01
4.33	-0.04
4.32	-0.08
4.26	0.03
4.37	0.02
4.38	-0.01
4.34	0
4.3	-0.02
4.37	0.03
4.28	-0.04
4.25	-0.08
4.4	0.04
4.29	0
4.29	-0.08
4.32	0.04
4.36	0.01
4.32	0.01
4.27	0.01
4.35	-0.04
4.28	0.03
4.24	0.04
4.35	0.05
4.37	-0.02
4.27	0.02
4.26	-0.01
4.3	-0.01
4.24	0.04
4.24	-0.05
4.37	-0.01
4.33	0
4.3	-0.03
4.36	-0.02
4.35	-0.02
4.26	-0.02
4.38	0.05
4.29	-0.07
4.28	-0.01
4.25	-0.07
4.34	-0.01
4.29	0.03
4.3	-0.06
4.32	0.02
4.35	0.12
4.27	-0.05
4.28	-0.07
4.32	0.01
4.35	-0.09
4.27	0.01
4.26	-0.03
4.27	-0.04
4.24	-0.05
4.29	0.04
4.32	0.02
4.34	-0.03
4.36	-0.03
4.29	-0.03
4.37	-0.01
4.32	-0.06
4.27	0
4.33	0
4.25	-0.02
4.41	-0.01
4.35	-0.02
4.39	-0.05
4.28	0.01
4.43	0.01
4.35	-0.01
4.38	-0.09
4.27	0.01
4.37	-0.03
4.25	0
4.25	-0.01
4.29	0.05
4.35	0.01
4.32	-0.08
4.25	-0.02
4.33	-0.08
4.33	0.07
4.38	0.06
4.24	-0.03
4.3	0.05
4.34	-0.01
4.29	-0.04
4.3	0.08
4.32	0.01
4.29	0.04
4.38	-0.04
4.29	0.02
4.33	0.13
4.38	0.03
4.46	-0.03
4.3	-0.04
4.33	0.04
4.29	-0.05
4.41	0
4.31	-0.01
4.3	-0.05
4.36	0.03
4.32	-0.07
4.34	0.02
4.31	-0.03
4.36	0.02
4.36	0.04
4.38	-0.07
4.3	-0.05
4.33	-0.07
4.35	0.04
4.29	0.02
4.29	0.06
4.38	0.07
4.32	0
4.35	-0.03
4.47	0.09
4.35	0.01
4.46	-0.07
4.41	0.15
4.36	0.05
4.29	0.06
4.32	-0.03
4.41	-0.07
4.31	0
4.31	-0.05
4.39	0.01
4.33	-0.01
4.37	0.04
4.36	0.04
4.45	-0.06
4.36	-0.08
4.31	0.1
4.39	0.01
4.31	0.01
4.37	-0.05
4.3	0.1
4.48	-0.03
4.36	-0.03
4.4	-0.04
4.3	-0.03
4.31	0.02
4.42	-0.01
4.39	-0.02
4.37	-0.01
4.34	0
4.45	0.03
4.44	-0.05
4.35	-0.08
4.3	0
4.31	0.04
4.34	0.05
4.34	0.06
4.38	0.03
4.37	0.05
4.41	-0.02
4.41	0.04
4.41	0.01
4.36	0.06
4.36	-0.02
4.32	0
4.33	0
4.41	0.08
4.37	-0.01
4.48	0
4.39	0.07
4.45	-0.04
4.35	0
4.36	0.04
4.34	-0.02
4.39	-0.07
4.36	-0.04
4.43	0
4.36	-0.04
4.29	-0.08
4.38	0.04
4.34	0.04
4.29	-0.04
4.42	-0.06
4.43	0
4.4	-0.04
4.4	0.03
4.33	-0.06
4.3	0.02
4.42	-0.03
4.41	0.03
4.43	0.02
4.31	-0.08
4.32	-0.04
4.32	0
4.4	-0.01
4.43	0.02
4.4	-0.05
4.35	0
4.41	-0.04
4.34	0.02
4.41	0.06
4.33	0.03
4.43	-0.05
4.43	0.06
4.32	-0.07
4.36	0.05
4.35	-0.07
4.33	-0.03
4.32	0.05
4.38	0.02
4.44	0
4.39	0.05
4.42	-0.02
4.4	-0.02
4.36	0.01
4.35	-0.01
4.36	-0.04
4.46	-0.06
4.45	0.05
4.4	-0.03
4.42	0.03
4.32	0.06
4.42	-0.02
4.42	0.02
4.42	0.01
4.32	0.09
4.35	-0.05
4.41	0.02
4.35	-0.04
4.34	-0.06
4.33	0.05
4.32	-0.02
4.35	-0.08
4.45	-0.06
4.39	-0.01
4.39	-0.07
4.44	0.03
4.36	0
4.4	0.02
4.46	-0.04
4.4	0.03
4.45	0.11
4.33	0.01
4.37	-0.03
4.44	-0.02
4.39	0.04
4.38	0.07
4.37	0.01
4.48	-0.08
4.45	0.05
4.37	-0.03
4.43	-0.01
4.34	0
4.57	-0.05
4.61	-0.03
4.62	-0.02
4.51	0.07
4.53	-0.06
4.57	0.09
4.52	0.01
4.53	0.02
4.53	-0.08
4.59	0.02
4.58	0.06
4.58	0.04
4.66	-0.03
4.55	-0.09
4.56	-0.09
4.55	0.02
4.55	-0.03
4.55	0.07
4.51	-0.07
4.6	0.08
4.53	0.08
4.54	0.01
4.55	-0.03
4.56	0.11
4.58	0
4.57	-0.03
4.64	0
4.52	-0.06
4.6	0.13
4.63	0.03
4.63	0.02
4.7	-0.05
4.64	-0.01
4.6	-0.02
4.59	0.03
4.51	-0.08
4.59	0
4.59	-0.09
4.62	0.02
4.61	-0.02
4.53	-0.02
4.59	-0.02
4.58	0
4.58	-0.03
4.53	-0.07
4.61	-0.09
4.65	-0.07
4.52	-0.02
4.62	0.04
4.62	0
4.61	0.05
4.59	0.07
4.58	0.06
4.53	-0.03
4.62	0.04
4.53	-0.05
4.52	0.01
4.58	-0.05
4.63	-0.02
4.56	0
4.6	0.08
4.54	-0.06
4.52	-0.02
4.55	-0.03
4.68	-0.01
4.55	0.04
4.62	-0.08
4.64	-0.02
4.52	0.06
4.53	0.01
4.63	0.03
4.65	-0.04
4.58	0
4.71	-0.05
4.66	0
[truncated: 14,383 more rows]
